# Supplementary material for: Biomimetic Carbon Sequestration and Cyanate Detoxification Using Heat-Purified Carbonic Anhydrase from Sulfurihydrogenibium yellowstonense
Source: MDPI journal article supplement (doi:10.3390/biomimetics8040365), 2023-08-14
Supplement: s1 [file s1]

## Supplementary material

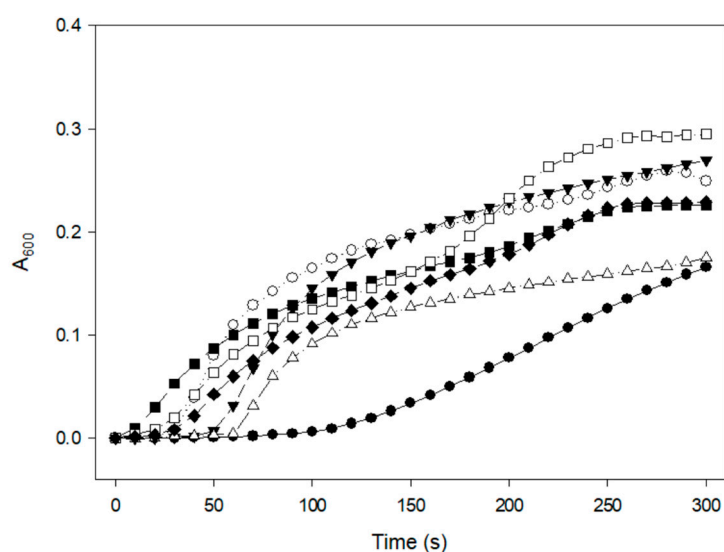

**Figure S1.** Rate of  $\text{CaCO}_3$  precipitation. Solid circle: negative control without enzyme; addition of 250 (open triangle), 300 (solid triangle), and 350 (open circle)  $\mu\text{g/mL}$  of column-purified SspCA; addition of 250 (solid diamond), 300 (open square), and 350 (solid square)  $\mu\text{g/mL}$  of heat-purified SspCA.

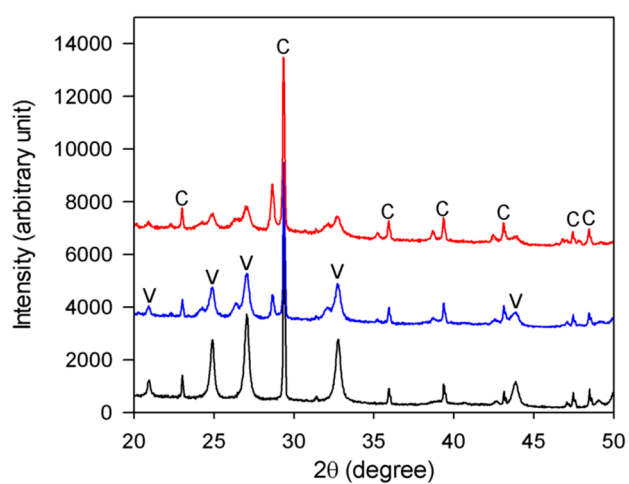

**Figure S2.** XRD patterns of precipitated  $\text{CaCO}_3$ . C: calcite; V: vaterite. Black: negative control without the addition of enzyme; blue: precipitation catalyzed by Ni-NTA column-purified SspCA; red: precipitation catalyzed by heat-purified SspCA.

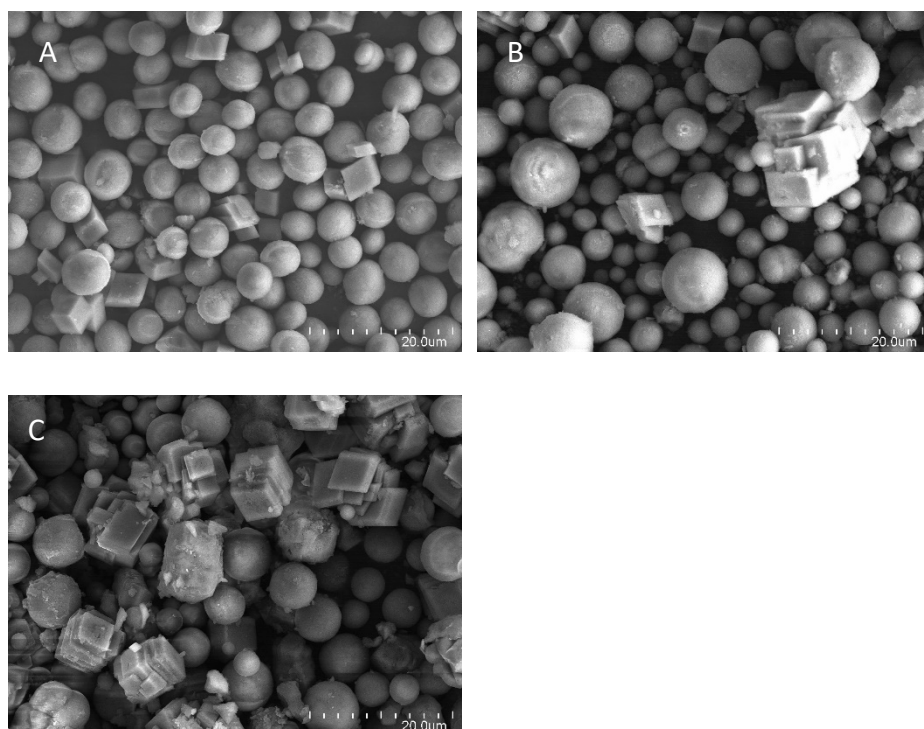

**Figure S3.** SEM images of precipitated  $\text{CaCO}_3$ . (A) Negative control without the addition of enzyme; (B) precipitation catalyzed by Ni-NTA column-purified SspCA; (C) precipitation catalyzed by heat-purified SspCA.

**Table S1.** Properties of SspCA purified by heating. The data were obtained from a culture volume of 50 mL.

| Temperature<br>(°C)                       | 70    |       |        |       | 80    |       |       |       | 90    |       |       |       |
|-------------------------------------------|-------|-------|--------|-------|-------|-------|-------|-------|-------|-------|-------|-------|
| Time (min)                                | 5     | 10    | 15     | 20    | 5     | 10    | 15    | 20    | 5     | 10    | 15    | 20    |
| Purity (%) <sup>1</sup>                   | 41    | 51    | 50     | 48    | 60    | 64    | 60    | 61    | 40    | 45    | 43    | 39    |
| Total activity<br>(WAU)                   | 2346  | 18833 | 20822  | 18576 | 19098 | 20106 | 14953 | 11720 | 6844  | 6429  | 3718  | 2028  |
|                                           | 0±    | ±     | ±      | ±     | ±     | ± 341 | ±     | ±     | ±     | ±     | ±     | ± 330 |
|                                           | 5974  | 3315  | 3315   | 5538  | 2082  |       | 3192  | 1768  | 1420  | 417   | 725   |       |
| Total protein<br>(mg)                     | 10    | 7     | 8      | 9     | 3     | 3     | 3     | 3     | 2     | 2     | 2     | 1     |
|                                           | ± 0.2 | ± 0.1 | ± 0.04 | ± 0.7 | ± 0.3 | ± 0.4 | ± 0.2 | ± 0.4 | ± 0.3 | ± 0.4 | ± 0.3 | ± 0.1 |
| Specific<br>activity<br>(WAU/mg<br>prot.) | 2441  | 2758  | 2470   | 2145  | 5870  | 5949  | 4495  | 3920  | 3334  | 3878  | 2419  | 1435  |
|                                           | ±     | ± 485 | ± 393  | ± 639 | ± 640 | ± 101 | ± 959 | ± 591 | ±     | ±     | ±     | ± 220 |
|                                           | 621   |       |        |       |       |       |       |       | 692   | 246   | 471   |       |

<sup>1</sup> The purity was determined from SDS-PAGE using densitometry.
